# Supplementary material for: Very close I⋯As and I⋯Sb interactions in trimethylpnictogen-pentafluoroiodobenzene cocrystals
Source: Royal Society of Chemistry journal article supplement (doi:10.1039/d1ce01268a), 2021-11-23
Supplement: d1ce01268a1.pdf [file d1ce01268a1.pdf]

# Electronic Supplementary Information (ESI)

## Very close I...As and I...Sb interactions in trimethylpnictogen-pentafluoriodobenzene cocrystals

Maciej Bujak,<sup>\*a,b</sup> Hans-Georg Stammer,<sup>b</sup> Yury V. Vishnevskiy,<sup>b</sup> and Norbert W. Mitzel<sup>\*b</sup>

<sup>a</sup>Faculty of Chemistry, University of Opole, Oleska 48, 45-052 Opole, Poland. E-mail: mbujak@uni.opole.pl

<sup>b</sup>Lehrstuhl für Anorganische Chemie und Strukturchemie, Fakultät für Chemie, Universität Bielefeld, Universitätsstr. 25, 33615 Bielefeld, Germany. E-mail: mitzel@uni-bielefeld.de

### Table of Contents

|                                                                                                                                                                                                                                                                                                                                                                                                                     |    |
|---------------------------------------------------------------------------------------------------------------------------------------------------------------------------------------------------------------------------------------------------------------------------------------------------------------------------------------------------------------------------------------------------------------------|----|
| <b>Table S1.</b> The crystal data and structure determination summary for (CH <sub>3</sub> ) <sub>3</sub> As·C <sub>6</sub> F <sub>5</sub> I, <b>1</b> at 220, 180, 150 and 100 K.                                                                                                                                                                                                                                  | 3  |
| <b>Table S2.</b> The crystal data and structure determination summary for (CH <sub>3</sub> ) <sub>3</sub> Sb·C <sub>6</sub> F <sub>5</sub> I, <b>2</b> at 210, 180, 150 and 100 K.                                                                                                                                                                                                                                  | 3  |
| <b>Table S3.</b> The crystal data and structure determination summary for (CH <sub>3</sub> ) <sub>3</sub> As, <b>3</b> at 150, 125 and 100 K.....                                                                                                                                                                                                                                                                   | 4  |
| <b>Table S4.</b> The crystal data and structure determination summary for (CH <sub>3</sub> ) <sub>3</sub> Sb, <b>4</b> at 170, 150 and 100 K.....                                                                                                                                                                                                                                                                   | 4  |
| <b>Table S5.</b> The molecular dimensions (Å, °) for (CH <sub>3</sub> ) <sub>3</sub> As·C <sub>6</sub> F <sub>5</sub> I, <b>1</b> at 220, 180, 150 and 100 K.....                                                                                                                                                                                                                                                   | 5  |
| <b>Table S6.</b> The molecular dimensions (Å, °) for (CH <sub>3</sub> ) <sub>3</sub> Sb·C <sub>6</sub> F <sub>5</sub> I, <b>2</b> at 210, 180, 150 and 100 K.....                                                                                                                                                                                                                                                   | 6  |
| <b>Table S7.</b> The molecular dimensions (Å, °) for (CH <sub>3</sub> ) <sub>3</sub> As, <b>3</b> at 150, 125 and 100 K (single crystal X-ray diffraction), compared to those determined by gas electron diffraction.....                                                                                                                                                                                           | 7  |
| <b>Table S8.</b> The molecular dimensions (Å, °) for (CH <sub>3</sub> ) <sub>3</sub> Sb, <b>4</b> at 170, 150 and 100 K (single crystal X-ray diffraction), compared to those determined by gas electron diffraction.....                                                                                                                                                                                           | 7  |
| <b>Table S9.</b> The dimensions (Å, °) of the intermolecular contacts for (CH <sub>3</sub> ) <sub>3</sub> As·C <sub>6</sub> F <sub>5</sub> I, <b>1</b> at 220, 180 and 150 K, compared to those commensurate with the sums of the van der Waals radii of respective atoms at 100 K.....                                                                                                                             | 8  |
| <b>Table S10.</b> The dimensions (Å, °) of the intermolecular contacts for (CH <sub>3</sub> ) <sub>3</sub> Sb·C <sub>6</sub> F <sub>5</sub> I, <b>2</b> at 210, 180 and 150 K, compared to those commensurate with the sums of the van der Waals radii of respective atoms at 100 K.....                                                                                                                            | 8  |
| <b>Table S11.</b> The dimensions (Å, °) of the intermolecular Sb...Sb contacts for (CH <sub>3</sub> ) <sub>3</sub> Sb, <b>4</b> at 170 and 150 K, compared to those commensurate with the sum of the van der Waals radii of Sb atoms at 100 K.....                                                                                                                                                                  | 9  |
| <b>Figure S1.</b> The fingerprint plots for (CH <sub>3</sub> ) <sub>3</sub> E molecules, at 100 K, in: <b>1</b> (a), <b>2</b> (b), <b>3</b> (c) and <b>4</b> (d) along with the highlighted E...E, E...H and H...H contacts (E = As for <b>1</b> and <b>3</b> , and E = Sb for <b>2</b> and <b>4</b> ).....                                                                                                         | 10 |
| <b>Figure S2.</b> The fingerprint plots for C <sub>6</sub> F <sub>5</sub> I molecules in: <b>1</b> (a), <b>2</b> (b), <b>5-I</b> (c) and <b>5-II</b> (d, note two symmetry independent molecules, upper C11-C16 and lower C21-C26) along with the highlighted I...F, F...F and F...C contacts. The structures of <b>1</b> , <b>2</b> and <b>5-II</b> were determined at 100 K, whereas <b>5-I</b> at 150 K.....     | 11 |
| <b>Quantum-chemical calculations</b> .....                                                                                                                                                                                                                                                                                                                                                                          | 12 |
| <b>Figure S3.</b> The molecular isodensity surfaces for <b>1</b> (a), <b>2</b> (b), <b>3</b> (c), <b>4</b> (d) and <b>5</b> (e) mapped with their electrostatic potential. The colours show positive from 0.02 a.u. (blue) to negative -0.002 a.u (red) and intermediate degrees (orange-green) of electrostatic potential. The calculated partial atomic charges (NBO), for selected atoms, are also provided..... | 15 |

|                                                                                                                                                                                                                                                                                                                                                                                                                                         |    |
|-----------------------------------------------------------------------------------------------------------------------------------------------------------------------------------------------------------------------------------------------------------------------------------------------------------------------------------------------------------------------------------------------------------------------------------------|----|
| <b>Table S12.</b> The optimized equilibrium distances $r(\text{I}\cdots\text{E})$ (Å) in $\text{H}_3\text{E}\cdots\text{ICH}_3$ at different levels of theory. E = As or Sb.....                                                                                                                                                                                                                                                        | 16 |
| <b>Table S13.</b> The stabilization energies ( $\text{kcal}\cdot\text{mol}^{-1}$ ) of $\text{H}_3\text{E}\cdots\text{ICH}_3$ calculated at different theoretical levels. E = As or Sb.....                                                                                                                                                                                                                                              | 16 |
| <b>Table S14.</b> The equilibrium Cartesian coordinates of atoms in $(\text{CH}_3)_3\text{As}\cdots\text{IC}_6\text{F}_5$ optimized at the PBE0-D3BJ/def2-QZVPP level.....                                                                                                                                                                                                                                                              | 16 |
| <b>Table S15.</b> The equilibrium Cartesian coordinates of atoms in $(\text{CH}_3)_3\text{Sb}\cdots\text{IC}_6\text{F}_5$ optimized at the PBE0-D3BJ/def2-QZVPP level.....                                                                                                                                                                                                                                                              | 16 |
| <b>Table S16.</b> The equilibrium Cartesian coordinates of atoms in $\text{H}_3\text{As}\cdots\text{ICH}_3$ optimized at the PBE0-D3BJ/def2-QZVPP level.....                                                                                                                                                                                                                                                                            | 17 |
| <b>Table S17.</b> The equilibrium Cartesian coordinates of atoms in $\text{H}_3\text{Sb}\cdots\text{ICH}_3$ optimized at the PBE0-D3BJ/def2-QZVPP level.....                                                                                                                                                                                                                                                                            | 17 |
| <b>Table S18.</b> The equilibrium Cartesian coordinates of atoms in $\text{H}_3\text{N}\cdots\text{ClF}$ optimized at the PBE0-D3BJ/def2-QZVPP level.....                                                                                                                                                                                                                                                                               | 17 |
| <b>Table S19.</b> The equilibrium Cartesian coordinates of atoms in $\text{HF}\cdots\text{HF}$ optimized at the PBE0-D3BJ/def2-QZVPP level.....                                                                                                                                                                                                                                                                                         | 17 |
| <b>Table S20.</b> The equilibrium Cartesian coordinates of atoms in $\text{CH}_4\cdots\text{CH}_4$ optimized at the PBE0-D3BJ/def2-QZVPP level.....                                                                                                                                                                                                                                                                                     | 17 |
| <b>Figure S4.</b> The DID plots of $(\text{CH}_3)_3\text{E}\cdots\text{IC}_6\text{F}_5$ at $10^{-5}$ e Bohr <sup>-3</sup> . E = As or Sb.                                                                                                                                                                                                                                                                                               | 18 |
| <b>Figure S5.</b> The I $\cdots$ E distances dependence of C–I $\cdots$ E angles for intermolecular interactions C–I $\cdots$ E (E = As or Sb) in <b>1</b> ■, <b>2</b> ●, as well as cocrystals of 1,3,5-trifluoro-2,4,6-triiodobenzene with triphenylarsine (tftib)(AsPh <sub>3</sub> ) ■, and -stibine (tftib)(SbPh <sub>3</sub> ) ●, at low temperatures between 100 and 253 K (temperature in K is marked close to the points)..... | 19 |
| <b>References</b> .....                                                                                                                                                                                                                                                                                                                                                                                                                 | 20 |

**Table S1.** Crystal data and structure determination summary for (CH<sub>3</sub>)<sub>3</sub>As·C<sub>6</sub>F<sub>5</sub>I, **1** at 220, 180, 150 and 100 K.

| formula                                           | C <sub>9</sub> H <sub>9</sub> AsF <sub>5</sub> I                  |
|---------------------------------------------------|-------------------------------------------------------------------|-------------------------------------------------------------------|-------------------------------------------------------------------|-------------------------------------------------------------------|
| <i>M<sub>r</sub></i>                              | 413.98                                                            | 413.98                                                            | 413.98                                                            | 413.98                                                            |
| crystal size, mm                                  | 0.3 × 0.3 × 0.2                                                   | 0.3 × 0.3 × 0.2                                                   | 0.3 × 0.3 × 0.2                                                   | 0.3 × 0.3 × 0.2                                                   |
| crystal system                                    | monoclinic                                                        | monoclinic                                                        | monoclinic                                                        | monoclinic                                                        |
| space group, <i>Z</i> , <i>Z'</i>                 | <i>C2/c</i> , 8, 1                                                |
| temperature, K                                    | 220.0(1)                                                          | 180.0(1)                                                          | 150.0(1)                                                          | 100.0(1)                                                          |
| <i>a</i> , Å                                      | 11.5901(3)                                                        | 11.5215(3)                                                        | 11.4664(3)                                                        | 11.3040(2)                                                        |
| <i>b</i> , Å                                      | 11.6731(3)                                                        | 11.6259(3)                                                        | 11.5939(2)                                                        | 11.5876(2)                                                        |
| <i>c</i> , Å                                      | 20.0896(5)                                                        | 20.0623(5)                                                        | 20.0447(4)                                                        | 20.0586(4)                                                        |
| $\beta$ , °                                       | 102.821(3)                                                        | 102.807(3)                                                        | 102.752(2)                                                        | 102.512(2)                                                        |
| <i>V</i> , Å <sup>3</sup>                         | 2650.21(12)                                                       | 2620.45(12)                                                       | 2599.02(10)                                                       | 2565.00(8)                                                        |
| $\rho$ , g/cm <sup>3</sup>                        | 2.075                                                             | 2.099                                                             | 2.116                                                             | 2.144                                                             |
| $\mu$ , mm <sup>-1</sup>                          | 4.925                                                             | 4.981                                                             | 5.022                                                             | 5.089                                                             |
| $\theta$ range, °                                 | 2.08 - 26.00                                                      | 2.08 - 26.00                                                      | 2.08 - 26.00                                                      | 2.08 - 26.00                                                      |
| index ranges                                      | -14 ≤ <i>h</i> ≤ 14<br>-14 ≤ <i>k</i> ≤ 14<br>-24 ≤ <i>l</i> ≤ 24 | -14 ≤ <i>h</i> ≤ 14<br>-14 ≤ <i>k</i> ≤ 14<br>-24 ≤ <i>l</i> ≤ 24 | -14 ≤ <i>h</i> ≤ 14<br>-14 ≤ <i>k</i> ≤ 14<br>-24 ≤ <i>l</i> ≤ 24 | -13 ≤ <i>h</i> ≤ 13<br>-14 ≤ <i>k</i> ≤ 14<br>-24 ≤ <i>l</i> ≤ 24 |
| reflns collected                                  | 18349                                                             | 18126                                                             | 18082                                                             | 17720                                                             |
| <i>R<sub>int</sub></i>                            | 0.0399                                                            | 0.0382                                                            | 0.0280                                                            | 0.0261                                                            |
| data [ <i>I</i> > 2σ( <i>I</i> )]                 | 2260                                                              | 2345                                                              | 2384                                                              | 2386                                                              |
| data/parameters                                   | 2603/149                                                          | 2574/149                                                          | 2551/149                                                          | 2510/148                                                          |
| GOF on <i>F</i> <sup>2</sup>                      | 1.041                                                             | 1.041                                                             | 1.092                                                             | 1.142                                                             |
| <i>R<sub>I</sub></i> [ <i>I</i> > 2σ( <i>I</i> )] | 0.0278                                                            | 0.0245                                                            | 0.0202                                                            | 0.0183                                                            |
| <i>R<sub>I</sub></i> (all data)                   | 0.0333                                                            | 0.0275                                                            | 0.0224                                                            | 0.0200                                                            |
| <i>wR</i> <sub>2</sub> (all data)                 | 0.0730                                                            | 0.0628                                                            | 0.0498                                                            | 0.0425                                                            |
| lrgst diff peak, e/Å <sup>3</sup>                 | 0.560                                                             | 0.607                                                             | 0.582                                                             | 0.606                                                             |
| lrgst diff hole, e/Å <sup>3</sup>                 | -0.406                                                            | -0.561                                                            | -0.530                                                            | -0.441                                                            |
| CCDC number                                       | 2057069                                                           | 2057070                                                           | 2057071                                                           | 2057072                                                           |

**Table S2.** Crystal data and structure determination summary for (CH<sub>3</sub>)<sub>3</sub>Sb·C<sub>6</sub>F<sub>5</sub>I, **2** at 210, 180, 150 and 100 K.

| formula                                           | C <sub>9</sub> H <sub>9</sub> F <sub>5</sub> ISb                |
|---------------------------------------------------|-----------------------------------------------------------------|-----------------------------------------------------------------|-----------------------------------------------------------------|-----------------------------------------------------------------|
| <i>M<sub>r</sub></i>                              | 460.82                                                          | 460.82                                                          | 460.82                                                          | 460.82                                                          |
| crystal size, mm                                  | 0.1 × 0.1 × 0.1                                                 | 0.1 × 0.1 × 0.1                                                 | 0.1 × 0.1 × 0.1                                                 | 0.1 × 0.1 × 0.1                                                 |
| crystal system                                    | monoclinic                                                      | monoclinic                                                      | monoclinic                                                      | monoclinic                                                      |
| space group, <i>Z</i> , <i>Z'</i>                 | <i>I2/a</i> , 8, 1                                              |
| temperature, K                                    | 210.0(1)                                                        | 180.0(1)                                                        | 150.0(1)                                                        | 100.0(1)                                                        |
| <i>a</i> , Å                                      | 20.2334(16)                                                     | 20.1543(14)                                                     | 20.0697(14)                                                     | 19.9342(16)                                                     |
| <i>b</i> , Å                                      | 6.0804(4)                                                       | 6.0578(3)                                                       | 6.0327(3)                                                       | 5.9935(3)                                                       |
| <i>c</i> , Å                                      | 23.4856(16)                                                     | 23.5026(14)                                                     | 23.5298(14)                                                     | 23.6586(14)                                                     |
| $\beta$ , °                                       | 107.930(8)                                                      | 108.230(7)                                                      | 108.600(7)                                                      | 109.451(7)                                                      |
| <i>V</i> , Å <sup>3</sup>                         | 2749.0(4)                                                       | 2725.4(3)                                                       | 2700.1(3)                                                       | 2665.3(3)                                                       |
| $\rho$ , g/cm <sup>3</sup>                        | 2.227                                                           | 2.246                                                           | 2.267                                                           | 2.297                                                           |
| $\mu$ , mm <sup>-1</sup>                          | 4.283                                                           | 4.320                                                           | 4.360                                                           | 4.417                                                           |
| $\theta$ range, °                                 | 1.82 - 26.00                                                    | 2.13 - 26.00                                                    | 2.14 - 26.00                                                    | 2.17 - 26.00                                                    |
| index ranges                                      | -24 ≤ <i>h</i> ≤ 24<br>-7 ≤ <i>k</i> ≤ 7<br>-28 ≤ <i>l</i> ≤ 28 | -24 ≤ <i>h</i> ≤ 24<br>-7 ≤ <i>k</i> ≤ 7<br>-28 ≤ <i>l</i> ≤ 28 | -24 ≤ <i>h</i> ≤ 24<br>-7 ≤ <i>k</i> ≤ 7<br>-29 ≤ <i>l</i> ≤ 29 | -24 ≤ <i>h</i> ≤ 24<br>-7 ≤ <i>k</i> ≤ 7<br>-29 ≤ <i>l</i> ≤ 29 |
| reflns collected                                  | 18500                                                           | 18159                                                           | 17700                                                           | 16495                                                           |
| <i>R<sub>int</sub></i>                            | 0.0544                                                          | 0.0509                                                          | 0.0493                                                          | 0.0583                                                          |
| data [ <i>I</i> > 2σ( <i>I</i> )]                 | 2363                                                            | 2423                                                            | 2408                                                            | 2394                                                            |
| data/parameters                                   | 2714/149                                                        | 2686/148                                                        | 2656/148                                                        | 2627/148                                                        |
| GOF on <i>F</i> <sup>2</sup>                      | 1.051                                                           | 1.090                                                           | 1.097                                                           | 1.072                                                           |
| <i>R<sub>I</sub></i> [ <i>I</i> > 2σ( <i>I</i> )] | 0.0273                                                          | 0.0270                                                          | 0.0252                                                          | 0.0275                                                          |
| <i>R<sub>I</sub></i> (all data)                   | 0.0329                                                          | 0.0314                                                          | 0.0295                                                          | 0.0312                                                          |
| <i>wR</i> <sub>2</sub> (all data)                 | 0.0663                                                          | 0.0624                                                          | 0.0565                                                          | 0.0629                                                          |
| lrgst diff peak, e/Å <sup>3</sup>                 | 0.920                                                           | 0.890                                                           | 0.651                                                           | 0.943                                                           |
| lrgst diff hole, e/Å <sup>3</sup>                 | -0.795                                                          | -0.704                                                          | -0.643                                                          | -0.622                                                          |
| CCDC number                                       | 2057073                                                         | 2057074                                                         | 2057075                                                         | 2057076                                                         |

**Table S3.** Crystal data and structure determination summary for (CH<sub>3</sub>)<sub>3</sub>As, **3** at 150, 125 and 100 K.

| formula                                           | C <sub>3</sub> H <sub>9</sub> As                                | C <sub>3</sub> H <sub>9</sub> As                                | C <sub>3</sub> H <sub>9</sub> As                                |
|---------------------------------------------------|-----------------------------------------------------------------|-----------------------------------------------------------------|-----------------------------------------------------------------|
| <i>M<sub>r</sub></i>                              | 120.02                                                          | 120.02                                                          | 120.02                                                          |
| crystal size, mm                                  | 0.2 × 0.2 × 0.1                                                 | 0.2 × 0.2 × 0.1                                                 | 0.2 × 0.2 × 0.1                                                 |
| crystal system                                    | orthorhombic                                                    | orthorhombic                                                    | orthorhombic                                                    |
| space group, <i>Z</i> , <i>Z'</i>                 | <i>Cmc</i> 2 <sub>1</sub> , 4, 0.5                              | <i>Cmc</i> 2 <sub>1</sub> , 4, 0.5                              | <i>Cmc</i> 2 <sub>1</sub> , 4, 0.5                              |
| temperature, K                                    | 150.0(1)                                                        | 125.0(1)                                                        | 100.0(1)                                                        |
| <i>a</i> , Å                                      | 9.3417(7)                                                       | 9.3043(5)                                                       | 9.2883(2)                                                       |
| <i>b</i> , Å                                      | 10.9779(7)                                                      | 10.9531(6)                                                      | 10.9515(3)                                                      |
| <i>c</i> , Å                                      | 5.2141(3)                                                       | 5.1983(2)                                                       | 5.18635(13)                                                     |
| <i>V</i> , Å <sup>3</sup>                         | 534.72(6)                                                       | 529.76(5)                                                       | 527.56(2)                                                       |
| <i>ρ</i> , g/cm <sup>3</sup>                      | 1.491                                                           | 1.505                                                           | 1.511                                                           |
| <i>μ</i> , mm <sup>-1</sup>                       | 6.179                                                           | 6.237                                                           | 6.263                                                           |
| <i>θ</i> range, °                                 | 2.86 - 25.89                                                    | 2.87 - 26.00                                                    | 2.88 - 25.97                                                    |
| index ranges                                      | -11 ≤ <i>h</i> ≤ 11<br>-13 ≤ <i>k</i> ≤ 13<br>-6 ≤ <i>l</i> ≤ 6 | -11 ≤ <i>h</i> ≤ 11<br>-13 ≤ <i>k</i> ≤ 13<br>-6 ≤ <i>l</i> ≤ 6 | -11 ≤ <i>h</i> ≤ 11<br>-13 ≤ <i>k</i> ≤ 13<br>-6 ≤ <i>l</i> ≤ 6 |
| reflns collected                                  | 4078                                                            | 4052                                                            | 12544                                                           |
| <i>R<sub>int</sub></i>                            | 0.0303                                                          | 0.0291                                                          | 0.0416                                                          |
| data [ <i>I</i> > 2σ( <i>I</i> )]                 | 546                                                             | 550                                                             | 549                                                             |
| data/parameters                                   | 554/29                                                          | 554/29                                                          | 551/29                                                          |
| GOF on <i>F</i> <sup>2</sup>                      | 1.101                                                           | 1.119                                                           | 1.106                                                           |
| <i>R<sub>I</sub></i> [ <i>I</i> > 2σ( <i>I</i> )] | 0.0481                                                          | 0.0478                                                          | 0.0191                                                          |
| <i>R<sub>I</sub></i> (all data)                   | 0.0486                                                          | 0.0478                                                          | 0.0192                                                          |
| <i>wR<sub>2</sub></i> (all data)                  | 0.1227                                                          | 0.1210                                                          | 0.0498                                                          |
| lrgst diff peak, e/Å <sup>3</sup>                 | 0.277                                                           | 0.326                                                           | 0.287                                                           |
| lrgst diff hole, e/Å <sup>3</sup>                 | -0.520                                                          | -0.495                                                          | -0.275                                                          |
| CCDC number                                       | 2057063                                                         | 2057064                                                         | 2057065                                                         |

**Table S4.** Crystal data and structure determination summary for (CH<sub>3</sub>)<sub>3</sub>Sb, **4** at 170, 150 and 100 K.

| formula                                           | C <sub>3</sub> H <sub>9</sub> Sb                                | C <sub>3</sub> H <sub>9</sub> Sb                                | C <sub>3</sub> H <sub>9</sub> Sb                                |
|---------------------------------------------------|-----------------------------------------------------------------|-----------------------------------------------------------------|-----------------------------------------------------------------|
| <i>M<sub>r</sub></i>                              | 166.86                                                          | 166.86                                                          | 166.86                                                          |
| crystal size, mm                                  | 0.3 × 0.3 × 0.3                                                 | 0.3 × 0.3 × 0.3                                                 | 0.3 × 0.3 × 0.3                                                 |
| crystal system                                    | monoclinic                                                      | monoclinic                                                      | monoclinic                                                      |
| space group, <i>Z</i> , <i>Z'</i>                 | <i>P</i> 2 <sub>1</sub> / <i>n</i> , 4, 1                       | <i>P</i> 2 <sub>1</sub> / <i>n</i> , 4, 1                       | <i>P</i> 2 <sub>1</sub> / <i>n</i> , 4, 1                       |
| temperature, K                                    | 170.0(1)                                                        | 150.0(1)                                                        | 100.0(1)                                                        |
| <i>a</i> , Å                                      | 6.12026(13)                                                     | 6.09729(11)                                                     | 6.04482(9)                                                      |
| <i>b</i> , Å                                      | 11.2342(2)                                                      | 11.20824(19)                                                    | 11.14435(16)                                                    |
| <i>c</i> , Å                                      | 8.55360(16)                                                     | 8.52671(15)                                                     | 8.48341(13)                                                     |
| <i>β</i> , °                                      | 96.8027(19)                                                     | 96.7940(17)                                                     | 96.8289(14)                                                     |
| <i>V</i> , Å <sup>3</sup>                         | 583.97(2)                                                       | 578.623(18)                                                     | 567.436(15)                                                     |
| <i>ρ</i> , g/cm <sup>3</sup>                      | 1.898                                                           | 1.916                                                           | 1.953                                                           |
| <i>μ</i> , mm <sup>-1</sup>                       | 4.562                                                           | 4.604                                                           | 4.695                                                           |
| <i>θ</i> range, °                                 | 3.81 - 26.00                                                    | 3.02 - 26.00                                                    | 4.33 - 26.00                                                    |
| index ranges                                      | -7 ≤ <i>h</i> ≤ 7<br>-13 ≤ <i>k</i> ≤ 13<br>-10 ≤ <i>l</i> ≤ 10 | -7 ≤ <i>h</i> ≤ 7<br>-13 ≤ <i>k</i> ≤ 13<br>-10 ≤ <i>l</i> ≤ 10 | -7 ≤ <i>h</i> ≤ 7<br>-13 ≤ <i>k</i> ≤ 13<br>-10 ≤ <i>l</i> ≤ 10 |
| reflns collected                                  | 7680                                                            | 7596                                                            | 7411                                                            |
| <i>R<sub>int</sub></i>                            | 0.0250                                                          | 0.0243                                                          | 0.0240                                                          |
| data [ <i>I</i> > 2σ( <i>I</i> )]                 | 1097                                                            | 1090                                                            | 1089                                                            |
| data/parameters                                   | 1139/41                                                         | 1128/41                                                         | 1103/41                                                         |
| GOF on <i>F</i> <sup>2</sup>                      | 1.103                                                           | 1.085                                                           | 1.171                                                           |
| <i>R<sub>I</sub></i> [ <i>I</i> > 2σ( <i>I</i> )] | 0.0146                                                          | 0.0134                                                          | 0.0123                                                          |
| <i>R<sub>I</sub></i> (all data)                   | 0.0159                                                          | 0.0145                                                          | 0.0126                                                          |
| <i>wR<sub>2</sub></i> (all data)                  | 0.0348                                                          | 0.0294                                                          | 0.0271                                                          |
| lrgst diff peak, e/Å <sup>3</sup>                 | 0.354                                                           | 0.447                                                           | 0.408                                                           |
| lrgst diff hole, e/Å <sup>3</sup>                 | -0.424                                                          | -0.280                                                          | -0.236                                                          |
| CCDC number                                       | 2057066                                                         | 2057067                                                         | 2057068                                                         |

**Table S5.** Molecular dimensions (Å, °) for (CH<sub>3</sub>)<sub>3</sub>As·C<sub>6</sub>F<sub>5</sub>I, **1** at 220, 180, 150 and 100 K.

| Temperature, K | 220      | 180      | 150       | 100       |
|----------------|----------|----------|-----------|-----------|
| As1–C1         | 1.920(5) | 1.933(5) | 1.936(4)  | 1.942(3)  |
| As1–C2         | 1.938(5) | 1.936(4) | 1.939(3)  | 1.944(3)  |
| As1–C3         | 1.949(5) | 1.945(4) | 1.949(3)  | 1.950(3)  |
| C1–As1–C2      | 97.7(3)  | 98.0(2)  | 98.05(18) | 97.87(15) |
| C1–As1–C3      | 98.5(2)  | 98.6(2)  | 98.44(16) | 98.61(14) |
| C2–As1–C3      | 98.8(2)  | 98.8(2)  | 98.77(16) | 98.88(14) |
| I1–C4          | 2.096(4) | 2.096(3) | 2.100(3)  | 2.101(2)  |
| F1–C5          | 1.335(5) | 1.341(4) | 1.340(4)  | 1.339(3)  |
| F2–C6          | 1.341(6) | 1.334(5) | 1.339(4)  | 1.342(4)  |
| F3–C7          | 1.352(6) | 1.352(5) | 1.347(4)  | 1.346(4)  |
| F4–C8          | 1.342(6) | 1.343(5) | 1.339(4)  | 1.342(4)  |
| F5–C9          | 1.333(5) | 1.328(5) | 1.334(4)  | 1.339(4)  |
| C4–C5          | 1.380(6) | 1.381(5) | 1.375(4)  | 1.379(4)  |
| C4–C9          | 1.378(5) | 1.380(5) | 1.380(4)  | 1.378(4)  |
| C5–C6          | 1.367(6) | 1.371(5) | 1.379(4)  | 1.382(4)  |
| C6–C7          | 1.372(8) | 1.382(7) | 1.378(6)  | 1.380(6)  |
| C7–C8          | 1.355(8) | 1.366(8) | 1.363(6)  | 1.364(6)  |
| C8–C9          | 1.372(6) | 1.375(6) | 1.375(5)  | 1.379(4)  |
| C5–C4–I1       | 121.0(3) | 121.3(3) | 121.2(2)  | 120.9(2)  |
| C9–C4–I1       | 120.8(3) | 120.5(3) | 120.6(2)  | 121.0(2)  |
| F1–C5–C4       | 120.3(4) | 120.1(3) | 120.5(3)  | 120.8(2)  |
| F1–C5–C6       | 118.7(5) | 118.1(4) | 118.1(3)  | 118.0(3)  |
| F2–C6–C5       | 119.8(6) | 120.7(5) | 120.2(4)  | 120.3(4)  |
| F2–C6–C7       | 120.8(5) | 120.8(4) | 120.9(3)  | 120.5(3)  |
| F3–C7–C6       | 119.3(6) | 118.7(6) | 118.5(4)  | 119.1(4)  |
| F3–C7–C8       | 120.1(7) | 120.3(6) | 120.6(4)  | 120.2(4)  |
| F4–C8–C7       | 120.3(5) | 120.1(4) | 120.2(4)  | 120.1(3)  |
| F4–C8–C9       | 119.8(6) | 120.3(5) | 120.4(4)  | 120.5(4)  |
| F5–C9–C4       | 120.7(4) | 121.1(3) | 121.0(3)  | 120.8(3)  |
| F5–C9–C8       | 118.4(5) | 117.9(4) | 117.8(3)  | 117.7(3)  |
| C4–C5–C6       | 121.0(5) | 121.8(4) | 121.4(3)  | 121.2(3)  |
| C4–C9–C8       | 120.9(5) | 121.0(4) | 121.2(3)  | 121.5(3)  |
| C5–C4–C9       | 118.2(4) | 118.2(3) | 118.2(3)  | 118.1(3)  |
| C5–C6–C7       | 119.5(5) | 118.5(4) | 118.8(3)  | 119.2(3)  |
| C6–C7–C8       | 120.6(5) | 121.0(4) | 120.9(3)  | 120.6(3)  |
| C7–C8–C9       | 119.8(5) | 119.5(4) | 119.4(4)  | 119.4(3)  |

**Table S6.** Molecular dimensions (Å, °) for (CH<sub>3</sub>)<sub>3</sub>Sb·C<sub>6</sub>F<sub>5</sub>I, **2** at 210, 180, 150 and 100 K.

| Temperature, K | 210      | 180      | 150      | 100      |
|----------------|----------|----------|----------|----------|
| Sb1–C1         | 2.127(6) | 2.124(6) | 2.128(5) | 2.130(5) |
| Sb1–C2         | 2.132(5) | 2.131(5) | 2.140(4) | 2.145(5) |
| Sb1–C3         | 2.099(6) | 2.109(5) | 2.115(5) | 2.126(5) |
| C1–Sb1–C2      | 95.9(2)  | 95.8(2)  | 95.9(2)  | 95.7(2)  |
| C1–Sb1–C3      | 94.0(3)  | 94.6(3)  | 94.9(3)  | 95.2(2)  |
| C2–Sb1–C3      | 96.4(3)  | 96.3(2)  | 96.1(2)  | 95.7(2)  |
| I1–C4          | 2.096(4) | 2.097(3) | 2.097(3) | 2.097(4) |
| F1–C5          | 1.343(5) | 1.346(4) | 1.348(4) | 1.350(5) |
| F2–C6          | 1.341(5) | 1.342(4) | 1.337(4) | 1.345(4) |
| F3–C7          | 1.339(5) | 1.337(4) | 1.335(4) | 1.334(5) |
| F4–C8          | 1.339(5) | 1.338(4) | 1.341(4) | 1.341(5) |
| F5–C9          | 1.335(4) | 1.339(4) | 1.337(4) | 1.339(4) |
| C4–C5          | 1.377(5) | 1.382(5) | 1.379(5) | 1.382(5) |
| C4–C9          | 1.372(5) | 1.377(5) | 1.377(5) | 1.382(6) |
| C5–C6          | 1.369(6) | 1.365(5) | 1.367(5) | 1.367(6) |
| C6–C7          | 1.370(7) | 1.373(6) | 1.375(6) | 1.377(6) |
| C7–C8          | 1.377(6) | 1.378(6) | 1.381(5) | 1.383(6) |
| C8–C9          | 1.371(5) | 1.371(5) | 1.371(5) | 1.371(6) |
| C5–C4–I1       | 120.9(3) | 121.1(3) | 121.2(3) | 121.2(3) |
| C9–C4–I1       | 121.3(3) | 121.4(3) | 121.2(2) | 121.2(3) |
| F1–C5–C4       | 120.3(3) | 119.8(3) | 119.9(3) | 119.8(4) |
| F1–C5–C6       | 117.8(3) | 118.3(3) | 118.1(3) | 118.4(3) |
| F2–C6–C5       | 120.5(4) | 120.3(4) | 120.3(4) | 120.2(4) |
| F2–C6–C7       | 120.4(4) | 120.3(4) | 120.3(3) | 120.0(4) |
| F3–C7–C6       | 120.3(4) | 120.3(4) | 120.4(3) | 120.6(4) |
| F3–C7–C8       | 119.3(4) | 119.4(4) | 119.8(3) | 119.7(4) |
| F4–C8–C7       | 119.6(4) | 119.5(4) | 119.2(3) | 119.0(4) |
| F4–C8–C9       | 121.2(4) | 121.2(4) | 121.2(3) | 121.4(4) |
| F5–C9–C4       | 120.5(3) | 120.2(3) | 120.4(3) | 120.2(3) |
| F5–C9–C8       | 117.8(3) | 118.1(3) | 118.0(3) | 118.2(4) |
| C4–C5–C6       | 121.9(4) | 121.9(4) | 122.0(3) | 121.8(4) |
| C4–C9–C8       | 121.7(4) | 121.7(3) | 121.6(3) | 121.7(4) |
| C5–C4–C9       | 117.7(3) | 117.5(3) | 117.6(3) | 117.5(4) |
| C5–C6–C7       | 119.1(4) | 119.4(3) | 119.4(3) | 119.8(4) |
| C6–C7–C8       | 120.4(4) | 120.2(3) | 119.8(3) | 119.7(4) |
| C7–C8–C9       | 119.2(4) | 119.3(3) | 119.6(3) | 119.6(4) |

**Table S7.** Molecular dimensions ( $\text{\AA}$ ,  $^\circ$ ) for  $(\text{CH}_3)_3\text{As}$ , **3** at 150, 125 and 100 K (single crystal X-ray diffraction), compared to those determined by gas electron diffraction.<sup>1</sup>

| Method                     | single crystal X-ray diffraction |          |           | gas electron diffraction |
|----------------------------|----------------------------------|----------|-----------|--------------------------|
|                            | Temperature, K                   | 150      | 125       |                          |
| As1–C1/C1 <sup>I</sup>     | 1.961(9)                         | 1.958(9) | 1.963(4)  | 1.968(3)                 |
| As1–C2                     | 1.960(3)                         | 1.958(3) | 1.963(3)  |                          |
| C1–As1–C1 <sup>I</sup>     | 96.2(6)                          | 96.0(5)  | 96.3(2)   | 96.1(5)                  |
| C1/C1 <sup>I</sup> –As1–C2 | 96.6(3)                          | 97.0(3)  | 96.85(12) |                          |

Symmetry code: (I)  $1 - x, y, z$ .

**Table S8.** Molecular dimensions ( $\text{\AA}$ ,  $^\circ$ ) for  $(\text{CH}_3)_3\text{Sb}$ , **4** at 170, 150 and 100 K (single crystal X-ray diffraction), compared to those determined by gas electron diffraction.<sup>1</sup>

| Method    | single crystal X-ray diffraction |           |            | gas electron diffraction |
|-----------|----------------------------------|-----------|------------|--------------------------|
|           | Temperature, K                   | 170       | 150        |                          |
| Sb1–C1    | 2.141(2)                         | 2.143(2)  | 2.1468(19) | 2.163(3)                 |
| Sb1–C2    | 2.144(3)                         | 2.146(2)  | 2.151(2)   |                          |
| Sb1–C3    | 2.143(2)                         | 2.148(2)  | 2.1538(18) |                          |
| C1–Sb1–C2 | 94.14(10)                        | 94.08(9)  | 94.09(8)   | 94.1(5)                  |
| C1–Sb1–C3 | 95.13(11)                        | 95.15(10) | 94.99(8)   |                          |
| C2–Sb1–C3 | 94.97(11)                        | 94.89(10) | 94.84(8)   |                          |

**Table S9.** Dimensions (Å, °) of the intermolecular contacts for (CH<sub>3</sub>)<sub>3</sub>As-C<sub>6</sub>F<sub>5</sub>I, **1** at 220, 180 and 150 K, compared to those commensurate with the sums of the van der Waals radii of respective atoms at 100 K.<sup>2</sup>

| Temperature, K                             | 220        | 180        | 150        | 100        |
|--------------------------------------------|------------|------------|------------|------------|
| I1...As1                                   | 3.3671(5)  | 3.3469(4)  | 3.3314(3)  | 3.3044(3)  |
| C4-I1...As1                                | 171.50(9)  | 171.50(8)  | 171.57(7)  | 171.60(6)  |
| I1...As1-C1                                | 119.9(2)   | 119.57(16) | 119.32(13) | 118.02(11) |
| I1...As1-C2                                | 106.11(15) | 105.63(13) | 105.37(10) | 105.24(9)  |
| I1...As1-C3                                | 129.71(15) | 130.16(13) | 130.70(10) | 131.90(9)  |
| F4...F4 <sup>I</sup>                       | 2.910(6)   | 2.892(6)   | 2.885(4)   | 2.886(4)   |
| C8-F4...F4 <sup>I</sup>                    | 85.5(3)    | 84.9(2)    | 84.50(18)  | 83.37(17)  |
| F4...F4 <sup>I</sup> -C8 <sup>I</sup>      | 85.5(3)    | 84.9(2)    | 84.50(18)  | 83.37(17)  |
| F2...C6 <sup>II</sup>                      | 3.037(5)   | 3.012(4)   | 3.001(4)   | 2.984(3)   |
| C6-F2...C6 <sup>II</sup>                   | 106.0(3)   | 105.6(2)   | 105.18(17) | 104.76(16) |
| F2...C6 <sup>II</sup> -C5 <sup>II</sup>    | 109.8(3)   | 110.0(2)   | 110.22(19) | 111.88(18) |
| F2...C6 <sup>II</sup> -C7 <sup>II</sup>    | 85.9(3)    | 85.0(3)    | 84.4(2)    | 82.2(2)    |
| C6...F2 <sup>II</sup>                      | 3.037(5)   | 3.012(4)   | 3.001(4)   | 2.984(3)   |
| C5-C6...F2 <sup>II</sup>                   | 109.8(3)   | 110.0(2)   | 110.22(19) | 111.88(18) |
| C7-C6...F2 <sup>II</sup>                   | 85.9(3)    | 85.0(3)    | 84.4(2)    | 82.2(2)    |
| C6...F2 <sup>II</sup> -C6 <sup>II</sup>    | 106.0(3)   | 105.6(2)   | 105.18(17) | 104.76(16) |
| F2...C7 <sup>II</sup>                      | 3.243(7)   | 3.202(6)   | 3.178(4)   | 3.114(4)   |
| C6-F2...C7 <sup>II</sup>                   | 118.3(3)   | 118.3(3)   | 118.03(19) | 117.98(18) |
| F2...C7 <sup>II</sup> -C6 <sup>II</sup>    | 69.1(3)    | 69.6(3)    | 70.0(2)    | 71.74(19)  |
| F2...C7 <sup>II</sup> -C8 <sup>II</sup>    | 117.5(3)   | 117.3(3)   | 117.2(2)   | 116.9(2)   |
| C7...F2 <sup>II</sup>                      | 3.243(7)   | 3.202(6)   | 3.178(4)   | 3.114(4)   |
| C6-C7...F2 <sup>II</sup>                   | 69.1(3)    | 69.6(3)    | 70.0(2)    | 71.74(19)  |
| C8-C7...F2 <sup>II</sup>                   | 117.5(3)   | 117.3(3)   | 117.2(2)   | 116.9(2)   |
| C7...F2 <sup>II</sup> -C6 <sup>II</sup>    | 118.3(3)   | 118.3(3)   | 118.0(2)   | 117.98(18) |
| F4...C8 <sup>I</sup>                       | 3.108(6)   | 3.079(5)   | 3.062(4)   | 3.039(4)   |
| C8-F4...C8 <sup>I</sup>                    | 111.0(3)   | 110.7(2)   | 110.3(2)   | 109.38(17) |
| F4...C8 <sup>I</sup> -C7 <sup>I</sup>      | 96.4(3)    | 96.2(3)    | 96.5(2)    | 98.0(2)    |
| F4...C8 <sup>I</sup> -C9 <sup>I</sup>      | 103.8(3)   | 103.6(3)   | 103.1(2)   | 100.9(2)   |
| C8...F4 <sup>I</sup>                       | 3.108(6)   | 3.079(5)   | 3.062(4)   | 3.039(4)   |
| C7-C8...F4 <sup>I</sup>                    | 96.4(3)    | 96.2(3)    | 96.5(2)    | 98.0(2)    |
| C9-C8...F4 <sup>I</sup>                    | 103.8(3)   | 103.6(3)   | 103.1(2)   | 100.9(2)   |
| C8...F4 <sup>I</sup> -C8 <sup>I</sup>      | 111.0(3)   | 110.7(2)   | 110.3(2)   | 109.38(17) |
| F4...H21 <sup>III</sup>                    | 2.71       | 2.69       | 2.67       | 2.66       |
| C8-F4...H21 <sup>III</sup>                 | 139        | 139        | 139        | 141        |
| F4...H21 <sup>III</sup> -C2 <sup>III</sup> | 133        | 131        | 130        | 129        |
| H21...F4 <sup>III</sup>                    | 2.71       | 2.69       | 2.67       | 2.66       |
| C2-H21...F4 <sup>III</sup>                 | 133        | 131        | 130        | 129        |
| H21...F4 <sup>III</sup> -C8 <sup>III</sup> | 139        | 139        | 139        | 141        |

Symmetry codes: (I)  $-1/2 - x, 1/2 - y, 1 - z$ ; (II)  $-x, -y, 1 - z$ ; (III)  $-x, 1 - y, 1 - z$ .



**Table S10.** Dimensions ( $\text{\AA}$ ,  $^\circ$ ) of the intermolecular contacts for  $(\text{CH}_3)_3\text{Sb}\cdot\text{C}_6\text{F}_5\text{I}$ , **2** at 210, 180 and 150 K, compared to those commensurate with the sums of the van der Waals radii of respective atoms at 100 K.<sup>2</sup>

| Temperature, K                             | 210        | 180        | 150        | 100        |
|--------------------------------------------|------------|------------|------------|------------|
| I1...Sb1                                   | 3.5457(4)  | 3.5297(4)  | 3.5150(4)  | 3.4951(4)  |
| C4-I1...Sb1                                | 171.94(10) | 172.13(10) | 172.23(10) | 172.22(11) |
| I1...Sb1-C1                                | 135.4(3)   | 135.4(2)   | 135.28(19) | 135.34(18) |
| I1...Sb1-C2                                | 113.52(15) | 113.65(14) | 113.89(12) | 114.43(13) |
| I1...Sb1-C3                                | 113.9(2)   | 113.48(17) | 113.08(15) | 112.66(15) |
| F1...F2 <sup>I</sup>                       | 2.876(4)   | 2.854(3)   | 2.835(3)   | 2.802(3)   |
| C5-F1...F2 <sup>I</sup>                    | 140.3(2)   | 139.9(2)   | 140.0(2)   | 139.8(2)   |
| F1...F2 <sup>I</sup> -C6 <sup>I</sup>      | 126.0(3)   | 126.3(2)   | 127.1(2)   | 128.7(2)   |
| F2...F1 <sup>II</sup>                      | 2.876(4)   | 2.854(3)   | 2.835(3)   | 2.802(3)   |
| C6-F2...F1 <sup>II</sup>                   | 126.0(3)   | 126.3(2)   | 127.1(2)   | 128.7(2)   |
| F2...F1 <sup>II</sup> -C5 <sup>II</sup>    | 140.3(2)   | 139.9(2)   | 140.0(2)   | 139.8(2)   |
| F4...H21 <sup>III</sup>                    | 2.59       | 2.56       | 2.58       | 2.58       |
| C8-F4...H21 <sup>III</sup>                 | 138        | 139        | 138        | 138        |
| F4...H21 <sup>III</sup> -C2 <sup>III</sup> | 138        | 139        | 136        | 134        |
| H21...F4 <sup>III</sup>                    | 2.59       | 2.56       | 2.58       | 2.58       |
| C2-H21...F4 <sup>III</sup>                 | 138        | 139        | 136        | 134        |
| H21...F4 <sup>III</sup> -C8 <sup>III</sup> | 138        | 139        | 138        | 138        |

Symmetry codes: (I)  $1-x, -1/2+y, 3/2-z$ ; (II)  $1-x, 1/2+y, 3/2-z$ ; (III)  $1-x, 2-y, 1-z$ .

**Table S11.** Dimensions ( $\text{\AA}$ ,  $^\circ$ ) of the intermolecular Sb...Sb contacts for  $(\text{CH}_3)_3\text{Sb}$ , **4** at 170 and 150 K, compared to those commensurate with the sum of the van der Waals radii of Sb atoms at 100 K.<sup>2</sup>

| Temperature, K                          | 170       | 150       | 100       |
|-----------------------------------------|-----------|-----------|-----------|
| Sb1...Sb1 <sup>I</sup>                  | 3.8706(3) | 3.8591(3) | 3.8374(2) |
| C1-Sb1...Sb1 <sup>I</sup>               | 85.90(7)  | 85.90(7)  | 85.92(6)  |
| C2-Sb1...Sb1 <sup>I</sup>               | 91.92(7)  | 92.19(7)  | 92.83(6)  |
| C3-Sb1...Sb1 <sup>I</sup>               | 172.94(8) | 172.75(7) | 172.20(6) |
| Sb1...Sb1 <sup>I</sup> -C1 <sup>I</sup> | 85.90(7)  | 85.90(7)  | 85.92(6)  |
| Sb1...Sb1 <sup>I</sup> -C2 <sup>I</sup> | 91.92(7)  | 92.19(7)  | 92.83(6)  |
| Sb1...Sb1 <sup>I</sup> -C3 <sup>I</sup> | 172.94(8) | 172.75(7) | 172.20(6) |

Symmetry code: (I)  $1-x, 1-y, 1-z$ .

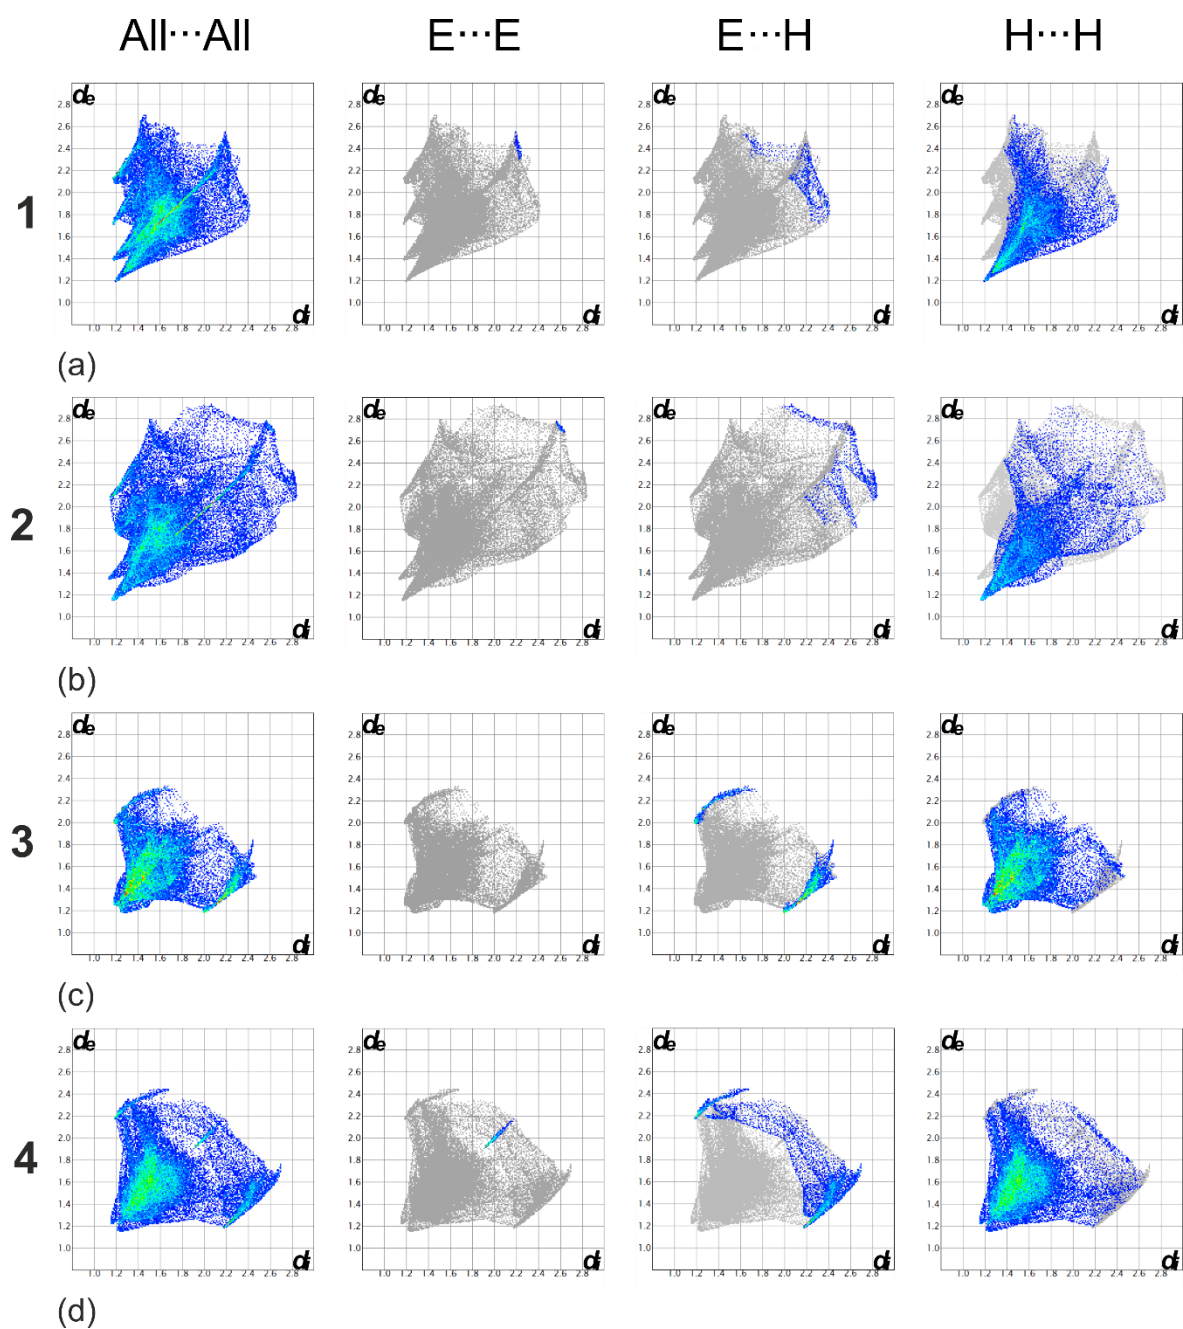

**Figure S1.** Fingerprint plots for  $(\text{CH}_3)_3\text{E}$  molecules, at 100 K, in: **1** (a), **2** (b), **3** (c) and **4** (d) along with the highlighted E...E, E...H and H...H contacts (E = As for **1** and **3**, and E = Sb for **2** and **4**).

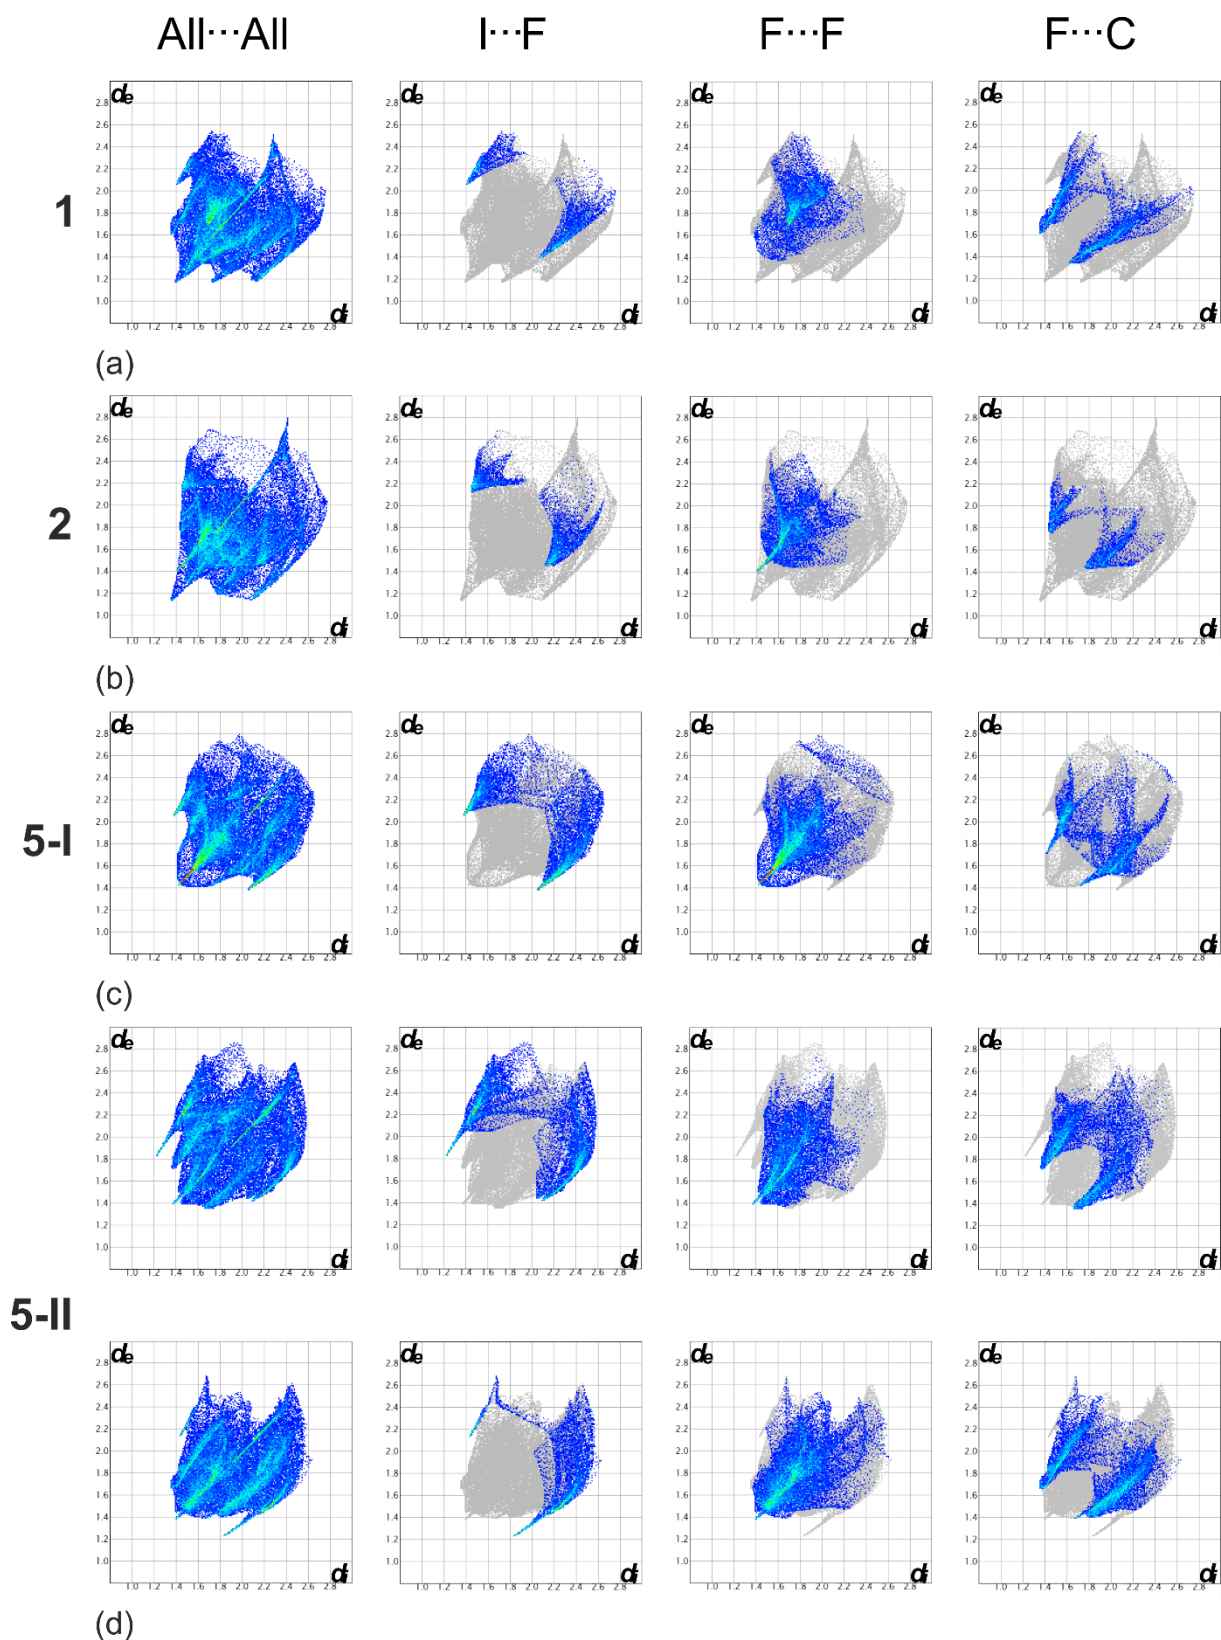

**Figure S2.** Fingerprint plots for  $C_6F_5I$  molecules in: **1** (a), **2** (b), **5-I**<sup>3a</sup> (c) and **5-II**<sup>3b</sup> (d, note two symmetry independent molecules, upper C11-C16 and lower C21-C26) along with the highlighted I...F, F...F and F...C contacts. The structures of **1**, **2** and **5-II** were determined at 100 K, whereas **5-I** at 150 K.

## Quantum-chemical calculations

Geometry optimizations and the calculations on **1–5** were performed using the Gaussian 09 program package<sup>4</sup> along with the GaussView 5.0 software as a graphical interface.<sup>5</sup> The DFT calculations were carried out at the B3LYP/3–21G\* level of theory,<sup>6</sup> in vacuum, for the geometries obtained from the X-ray diffraction results as an input.<sup>3a</sup> The molecular isodensity surfaces for **1–5** mapped with their electrostatic potential along with the calculated partial atomic charges (NBO), for selected atoms, are depicted in Figure S3. To further understand the nature of interactions in **1** and **2** the described below studies were carried out.

In the first stage the calibration of theoretical approximations was performed - two small model systems,  $\text{H}_3\text{As}\cdots\text{ICH}_3$  and  $\text{H}_3\text{Sb}\cdots\text{ICH}_3$ , were investigated. Their geometries were fully optimized using the CCSD(T)<sup>7</sup> level of theory with basis sets from the cc-pwCVnZ ( $n = 2, 3, 4$ ) family,<sup>8</sup> small-core pseudopotentials for As, Sb and I atoms within respective cc-pwCVnZ-PP sets,<sup>9</sup> and in all-electron variant for the other atoms.<sup>10</sup> From the results extrapolations of  $r(\text{I}\cdots\text{E})$  distances ( $\text{E} = \text{As}$  or  $\text{Sb}$ ) to the complete basis set limit were done. Also, the stabilization energies were calculated. The energies for the complete basis set (CBS) limit were obtained by fitting to the exponential function in the same way as for geometrical parameters. In addition, several lower-level calculations for the same two molecules were carried out. The geometry optimizations were done with DFT using PBE0-D3BJ/def2-QZVPP<sup>11,12</sup> and frozen-core spin-component-scaled MP2/def2-TZVPP<sup>13,14</sup> levels of theory as implemented in Gaussian 16 program package.<sup>15</sup> Stabilization energies were also computed for the aforementioned DFT and MP2 geometries using single-point frozen-core DLPNO-CCSD(T)/def2-QZVPP<sup>16</sup> calculations (with the TightPNO setting) in Orca 4.2.1.<sup>17</sup> The results of these calculations are summarized in Tables S12 and S13. It is clear, from these data, that the stated above DFT approximation gave the closest  $r_e(\text{I}\cdots\text{E})$  distance to the reference values from the coupled cluster estimations for the complete basis set limit. Using the same reference for the stabilization energies the best affordable level of theory was DLPNO-CCSD(T)/def2-QZVPP. The dependence on used geometrical structures in these single-point calculations was found to be minimal. Thus, based on the calibration procedure, the DLPNO-CCSD(T)/def2-QZVPP//PBE0-D3BJ/def2-QZVPP level of theory was determined as the most accurate and has been used in all the subsequent calculations. The computed equilibrium distances  $\text{I}\cdots\text{E}$  in  $(\text{CH}_3)_3\text{As}\cdots\text{IC}_6\text{F}_5$  and  $(\text{CH}_3)_3\text{Sb}\cdots\text{IC}_6\text{F}_5$  are 3.249 and 3.469 Å, respectively. The binding energies for these two systems are  $-4.96$  and  $-4.12$  kcal mol<sup>-1</sup>, respectively (note, the estimated accuracy is about 0.1 Å and 0.1 kcal mol<sup>-1</sup> with respect to the canonical CCSD(T)/CBS approximation).

To understand the nature of interactions between  $(\text{CH}_3)_3\text{E}$  ( $\text{E} = \text{As}$  or  $\text{Sb}$ ) and  $\text{C}_6\text{F}_5\text{I}$  components in  $(\text{CH}_3)_3\text{E}\cdots\text{IC}_6\text{F}_5$  systems the local energy decomposition (LED) analysis<sup>18</sup> was applied. For comparison the same analysis was also performed for the two calibration molecules and for simple systems  $\text{H}_3\text{N}\cdots\text{CIF}$ ,  $\text{HF}\cdots\text{HF}$  and  $\text{CH}_4\cdots\text{CH}_4$ . The results are collected in Table 1 of the paper. Figure S4 shows the dispersion interaction densities (DID)<sup>19</sup> in  $(\text{CH}_3)_3\text{E}\cdots\text{IC}_6\text{F}_5$  ( $\text{E} = \text{As}$  or  $\text{Sb}$ ). DID is the electron density associated with the dispersion component of the interaction energy in LED analysis. This property is calculated in analogy to the earlier

investigations<sup>20</sup> based on MP2 method. Note, here DID is related only to the intermolecular interaction and does not show intramolecular dispersion. Interestingly, in  $(\text{CH}_3)_3\text{E}\cdots\text{IC}_6\text{F}_5$  systems DID is located not only on frontier atoms but also on E–C bonds (on As–C to a larger extent), whereas the atoms in the aromatic rings are not affected.

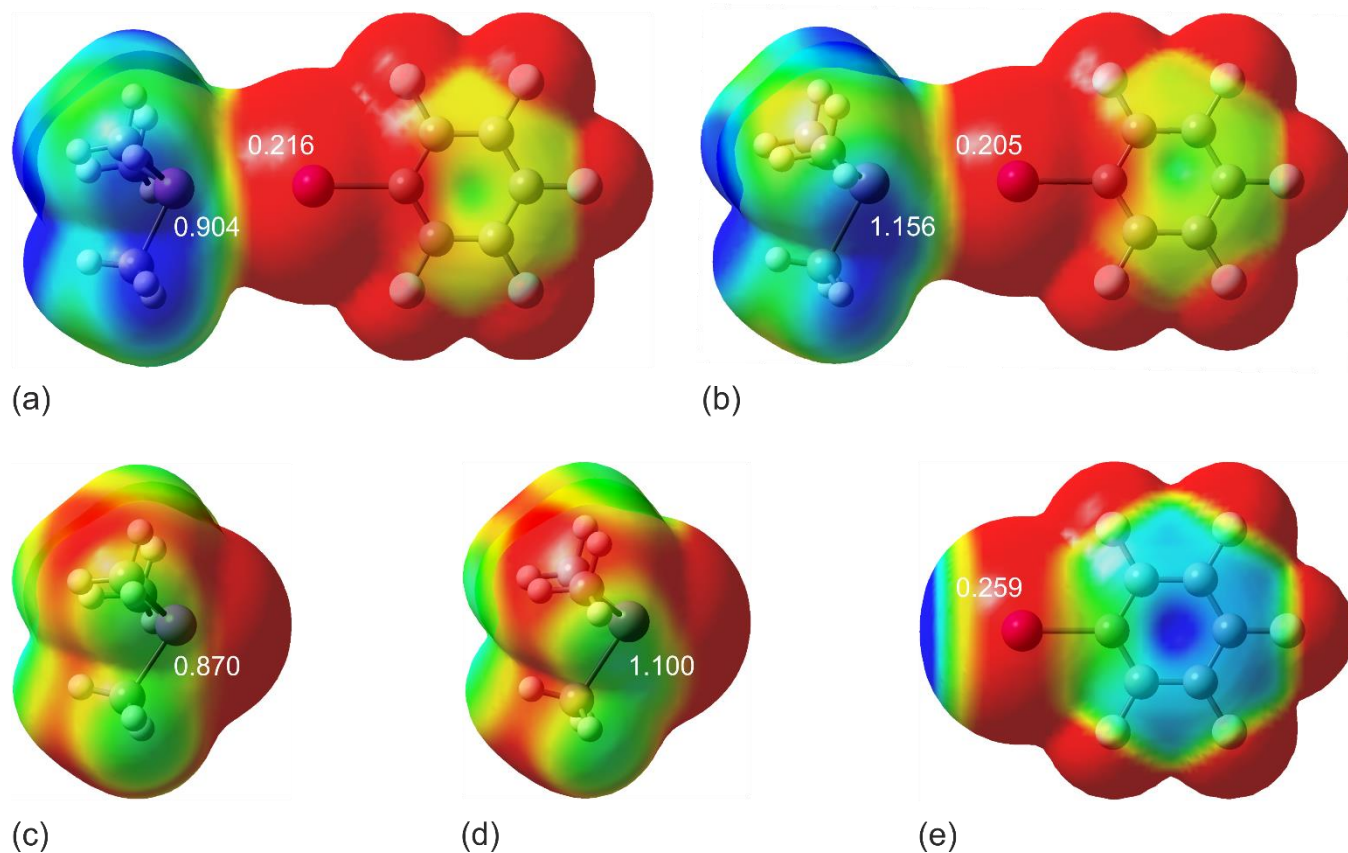

**Figure S3.** Molecular isodensity surfaces for **1** (a), **2** (b), **3** (c), **4** (d) and **5<sup>3a</sup>** (e) mapped with their electrostatic potential. The colours show positive from 0.02 a.u. (blue) to negative  $-0.002$  a.u. (red) and intermediate degrees (orange-green) of electrostatic potential. The calculated partial atomic charges (NBO), for the selected atoms, are also provided.

**Table S12.** Optimized equilibrium distances  $r(\text{I}\cdots\text{E})$  (Å) in  $\text{H}_3\text{E}\cdots\text{ICH}_3$  at different levels of theory. E = As or Sb.

|                                         | PBE0-D3BJ/def2-QZVPP | fc-SCS-MP2/def2-TZVPP | ae-CCSD(T)/cc-pwCVDZ-PP | ae-CCSD(T)/cc-pwCVTZ-PP | ae-CCSD(T)/cc-pwCVQZ-PP | ae-CCSD(T)/CBS-PP |
|-----------------------------------------|----------------------|-----------------------|-------------------------|-------------------------|-------------------------|-------------------|
| $\text{H}_3\text{As}\cdots\text{ICH}_3$ | 3.704                | 3.890                 | 4.017                   | 3.918                   | 3.844                   | 3.625             |
| $\text{H}_3\text{Sb}\cdots\text{ICH}_3$ | 3.851                | 4.046                 | 4.251                   | 4.095                   | 3.995                   | 3.816             |

**Table S13.** Stabilization energies ( $\text{kcal mol}^{-1}$ ) of  $\text{H}_3\text{E}\cdots\text{ICH}_3$  calculated at different theoretical levels. E = As or Sb.

|                                         | PBE0-D3BJ/def2-QZVPP | fc-SCS-MP2/def2-TZVPP | DLPNO-CCSD(T)/def2-QZVPP//PBE0-D3BJ/def2-QZVPP | DLPNO-CCSD(T)/def2-QZVPP//fc-SCS-MP2/def2-TZVPP | ae-CCSD(T)/cc-pwCVDZ-PP | ae-CCSD(T)/cc-pwCVTZ-PP | ae-CCSD(T)/cc-pwCVQZ-PP | ae-CCSD(T)/CBS-PP |
|-----------------------------------------|----------------------|-----------------------|------------------------------------------------|-------------------------------------------------|-------------------------|-------------------------|-------------------------|-------------------|
| $\text{H}_3\text{As}\cdots\text{ICH}_3$ | -1.96                | -1.39                 | -1.52                                          | -1.56                                           | -1.00                   | -1.15                   | -1.36                   | -1.64             |
| $\text{H}_3\text{Sb}\cdots\text{ICH}_3$ | -2.03                | -1.33                 | -1.57                                          | -1.58                                           | -0.89                   | -1.16                   | -1.43                   | -1.66             |

**Table S14.** Equilibrium Cartesian coordinates of atoms in (CH<sub>3</sub>)<sub>3</sub>As⋯IC<sub>6</sub>F<sub>5</sub> optimized at the PBE0-D3BJ/def2-QZVPP level.

|    |          |          |          |
|----|----------|----------|----------|
| As | 3.70052  | 0.00055  | -0.00007 |
| C  | 4.63083  | -1.21907 | -1.20951 |
| H  | 5.71122  | -1.11835 | -1.10389 |
| H  | 4.33682  | -2.24282 | -0.98250 |
| H  | 4.34322  | -0.99532 | -2.23580 |
| C  | 4.64070  | 1.65318  | -0.44781 |
| H  | 4.35302  | 1.96948  | -1.44942 |
| H  | 4.35320  | 2.43173  | 0.25734  |
| H  | 5.72024  | 1.50629  | -0.40820 |
| C  | 4.63283  | -0.44273 | 1.65830  |
| H  | 4.34607  | 0.26797  | 2.43208  |
| H  | 4.33950  | -1.44139 | 1.97874  |
| H  | 5.71305  | -0.40882 | 1.51496  |
| I  | 0.45114  | 0.00218  | -0.00019 |
| C  | -1.65381 | 0.00065  | -0.00005 |
| C  | -2.36570 | -1.18704 | -0.00001 |
| C  | -2.36746 | 1.18728  | -0.00001 |
| C  | -3.75030 | -1.19959 | 0.00006  |
| C  | -3.75208 | 1.19776  | 0.00006  |
| C  | -4.44468 | -0.00143 | 0.00009  |
| F  | -1.73805 | 2.35536  | -0.00004 |
| F  | -4.41906 | 2.34237  | 0.00010  |
| F  | -5.76668 | -0.00241 | 0.00016  |
| F  | -4.41558 | -2.34518 | 0.00010  |
| F  | -1.73457 | -2.35420 | -0.00004 |

**Table S15.** Equilibrium Cartesian coordinates of atoms in (CH<sub>3</sub>)<sub>3</sub>Sb⋯IC<sub>6</sub>F<sub>5</sub> optimized at the PBE0-D3BJ/def2-QZVPP level.

|    |          |          |          |
|----|----------|----------|----------|
| Sb | 3.50060  | -0.00002 | -0.00019 |
| C  | 4.59897  | -1.49162 | -1.08413 |
| H  | 5.66806  | -1.32309 | -0.95932 |
| H  | 4.33934  | -2.48041 | -0.70931 |
| H  | 4.34230  | -1.43797 | -2.14095 |
| C  | 4.59793  | 1.68619  | -0.74763 |
| H  | 4.34107  | 1.85502  | -1.79221 |
| H  | 4.33779  | 2.57436  | -0.17397 |
| H  | 5.66714  | 1.49589  | -0.66095 |
| C  | 4.59504  | -0.19416 | 1.83584  |
| H  | 4.33540  | 0.62542  | 2.50406  |
| H  | 4.33608  | -1.13579 | 2.31739  |
| H  | 5.66457  | -0.17186 | 1.62955  |
| I  | 0.03145  | -0.00009 | -0.00077 |
| C  | -2.06666 | -0.00003 | -0.00026 |
| C  | -2.77807 | -1.18834 | -0.00009 |
| C  | -2.77799 | 1.18833  | -0.00009 |
| C  | -4.16268 | -1.19887 | 0.00023  |
| C  | -4.16261 | 1.19895  | 0.00023  |
| C  | -4.85591 | 0.00006  | 0.00039  |
| F  | -2.14709 | 2.35462  | -0.00022 |
| F  | -4.82834 | 2.34368  | 0.00039  |
| F  | -6.17741 | 0.00010  | 0.00069  |
| F  | -4.82849 | -2.34356 | 0.00040  |
| F  | -2.14724 | -2.35468 | -0.00022 |

**Table S16.** Equilibrium Cartesian coordinates of atoms in H<sub>3</sub>As⋯ICH<sub>3</sub> optimized at the PBE0-D3BJ/def2-QZVPP level.

|    |          |          |          |
|----|----------|----------|----------|
| I  | 0.00000  | 0.00000  | 1.18047  |
| C  | 0.00000  | 0.00000  | 3.31119  |
| H  | 0.89376  | -0.51601 | 3.64467  |
| H  | 0.00000  | 1.03203  | 3.64467  |
| H  | -0.89376 | -0.51601 | 3.64467  |
| As | 0.00000  | 0.00000  | -2.52400 |
| H  | 0.00000  | 1.26941  | -3.35814 |
| H  | -1.09934 | -0.63471 | -3.35814 |
| H  | 1.09934  | -0.63471 | -3.35814 |

**Table S17.** Equilibrium Cartesian coordinates of atoms in H<sub>3</sub>Sb...ICH<sub>3</sub> optimized at the PBE0-D3BJ/def2-QZVPP level.

---

|    |          |          |          |
|----|----------|----------|----------|
| I  | 0.00000  | 0.00000  | 1.64349  |
| C  | 0.00000  | 0.00000  | 3.77489  |
| H  | 0.00000  | -1.03236 | 4.10712  |
| H  | 0.89405  | 0.51618  | 4.10712  |
| H  | -0.89405 | 0.51618  | 4.10712  |
| Sb | 0.00000  | 0.00000  | -2.20779 |
| H  | 0.00000  | 1.41480  | -3.15943 |
| H  | -1.22525 | -0.70740 | -3.15943 |
| H  | 1.22525  | -0.70740 | -3.15943 |

---

**Table S18.** Equilibrium Cartesian coordinates of atoms in H<sub>3</sub>N...ClF optimized at the PBE0-D3BJ/def2-QZVPP level.

---

|    |          |          |          |
|----|----------|----------|----------|
| N  | 0.00000  | 0.00000  | -1.99989 |
| H  | 0.00000  | 0.95271  | -2.33536 |
| H  | -0.82507 | -0.47636 | -2.33536 |
| H  | 0.82507  | -0.47636 | -2.33536 |
| Cl | 0.00000  | 0.00000  | 0.22025  |
| F  | 0.00000  | 0.00000  | 1.91790  |

---

**Table S19.** Equilibrium Cartesian coordinates of atoms in HF...HF optimized at the PBE0-D3BJ/def2-QZVPP level.

---

|   |          |          |         |
|---|----------|----------|---------|
| F | 0.03766  | -1.29284 | 0.00000 |
| H | -0.83023 | -1.60049 | 0.00000 |
| F | 0.03766  | 1.41543  | 0.00000 |
| H | 0.15228  | 0.49717  | 0.00000 |

---

**Table S20.** Equilibrium Cartesian coordinates of atoms in CH<sub>4</sub>...CH<sub>4</sub> optimized at the PBE0-D3BJ/def2-QZVPP level.

---

|   |          |          |          |
|---|----------|----------|----------|
| C | 0.00000  | 0.00000  | 1.85854  |
| H | 0.00000  | 1.02551  | 1.49424  |
| H | -0.88812 | -0.51275 | 1.49424  |
| H | 0.88812  | -0.51275 | 1.49424  |
| H | 0.00000  | 0.00000  | 2.94686  |
| C | 0.00000  | 0.00000  | -1.85854 |
| H | 0.00000  | 0.00000  | -2.94686 |
| H | -0.88812 | 0.51275  | -1.49424 |
| H | 0.00000  | -1.02551 | -1.49424 |
| H | 0.88812  | 0.51275  | -1.49424 |

---

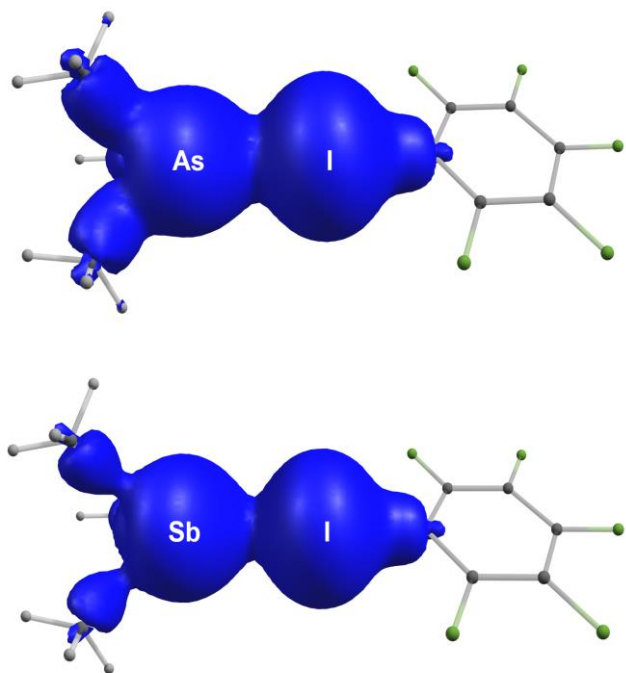

**Figure S4.** The DID plots of  $(\text{CH}_3)_3\text{E}\cdots\text{IC}_6\text{F}_5$  at  $10^{-5} \text{ e Bohr}^{-3}$ . E = As or Sb.

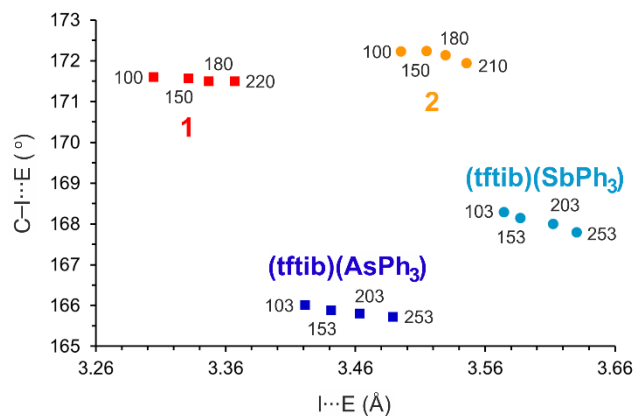

**Figure S5.** The I...E distances dependence of C-I...E angles for intermolecular interactions C-I...E (E = As or Sb) in **1** ■, **2** ●, as well as cocrystals of 1,3,5-trifluoro-2,4,6-triiodobenzene with triphenylarsine (tftib)(AsPh<sub>3</sub>) ■, and -stibine (tftib)(SbPh<sub>3</sub>) ●, at low temperatures between 100 and 253 K (temperature in K is marked close to the points).<sup>21</sup>



## References

- 1 R. Blom, A. Haaland and R. Seip, *Acta Chem. Scand. A*, 1983, **37**, 595–599.
- 2 (a) A. Bondi, *J. Phys. Chem.*, 1964, **68**, 441–451; (b) S. S. Batsanov, *Inorg. Mater.*, 2001, **37**, 871–885; (c) S.-Z. Hu, Z.-H. Zhou, Z.-X. Xie and B. E. Robertson, *Z. Kristallogr.*, 2014, **229**, 517–523.
- 3 (a) H. J. Frohn, S. Görg, G. Henkel and M. Läge, *Z. Anorg. Allg. Chem.*, 1995, **621**, 1251–1256; (b) M. Bujak, H.-G. Stammer and N. W. Mitzel, *Cryst. Growth Des.*, 2020, **20**, 3217–3223.
- 4 M. J. Frisch, G. W. Trucks, H. B. Schlegel, G. E. Scuseria, M. A. Robb, J. R. Cheeseman, G. Scalmani, V. Barone, B. Mennucci, G. A. Petersson, H. Nakatsuji, M. Caricato, X. Li, H. P. Hratchian, A. F. Izmaylov, J. Bloino, G. Zheng, J. L. Sonnenberg, M. Hada, M. Ehara, K. Toyota, R. Fukuda, J. Hasegawa, M. Ishida, T. Nakajima, Y. Honda, O. Kitao, H. Nakai, T. Vreven, J. A. Montgomery, Jr., J. E. Peralta, F. Ogliaro, M. Bearpark, J. J. Heyd, E. Brothers, K. N. Kudin, V. N. Staroverov, R. Kobayashi, J. Normand, K. Raghavachari, A. Rendell, J. C. Burant, S. S. Iyengar, J. Tomasi, M. Cossi, N. Rega, J. M. Millam, M. Klene, J. E. Knox, J. B. Cross, V. Bakken, C. Adamo, J. Jaramillo, R. Gomperts, R. E. Stratmann, O. Yazyev, A. J. Austin, R. Cammi, C. Pomelli, J. W. Ochterski, R. L. Martin, K. Morokuma, V. G. Zakrzewski, G. A. Voth, P. Salvador, J. J. Dannenberg, S. Dapprich, A. D. Daniels, O. Farkas, J. B. Foresman, J. V. Ortiz, J. Cioslowski and D. J. Fox, *Gaussian 09*, Revision A.02, Gaussian, Inc., Wallingford CT (USA), 2009.
- 5 R. Dennington, T. Keith and J. Millam, *GaussView 5.0*, Semichem Inc., Shawnee Mission, KS (USA), 2009.
- 6 (a) A. D. Becke, *Phys. Rev. A*, 1988, **38**, 3098–3100; (b) C. Lee, W. Yang and R. G. Parr, *Phys. Rev. B*, 1988, **37**, 785–789.
- 7 K. Raghavachari, G. W. Trucks, J. A. Pople and M. Head-Gordon, *Chem. Phys. Lett.*, 1989, **157**, 479–483.
- 8 K. A. Peterson and T. H. Dunning, *J. Chem. Phys.*, 2002, **117**, 10548–10560.
- 9 K. A. Peterson and K. E. Yousaf, *J. Chem. Phys.*, 2010, **133**, 174116.
- 10 D. A. Matthews, L. Cheng, M. E. Harding, F. Lipparini, S. Stopkowicz, T.-C. Jagau, P. G. Szalay, J. Gauss and J. F. Stanton, *J. Chem. Phys.*, 2020, **152**, 214108.
- 11 C. Adamo and V. Barone, *J. Chem. Phys.*, 1999, **110**, 6158–6170.
- 12 S. Grimme, S. Ehrlich and L. Goerigk, *J. Comput. Chem.*, 2011, **32**, 1456–1465.
- 13 M. J. Frisch, M. Head-Gordon and J. A. Pople, *Chem. Phys. Lett.*, 1990, **166**, 275–280.
- 14 M. Gerenkamp and S. Grimme, *Chem. Phys. Lett.*, 2004, **392**, 229–235.
- 15 M. J. Frisch, G. W. Trucks, H. B. Schlegel, G. E. Scuseria, M. A. Robb, J. R. Cheeseman, G. Scalmani, V. Barone, G. A. Petersson, H. Nakatsuji, X. Li, M. Caricato, A. V. Marenich, J. Bloino, B. G. Janesko, R. Gomperts, B. Mennucci, H. P. Hratchian, J. V. Ortiz, A. F. Izmaylov, J. L. Sonnenberg, D. Williams-Young, F. Ding, F. Lipparini, F. Egidi, J. Goings, B. Peng, A. Petrone, T. Henderson, D. Ranasinghe, V. G. Zakrzewski, J. Gao, N. Rega, G. Zheng, W. Liang, M. Hada, M. Ehara, K. Toyota, R. Fukuda, J. Hasegawa, M. Ishida, T. Nakajima, Y. Honda, O. Kitao, H. Nakai, T. Vreven, K. Throssell, J. A. Montgomery Jr., J. E. Peralta, F. Ogliaro, M. J. Bearpark, J. J. Heyd, E. N. Brothers, K. N. Kudin, V. N. Staroverov, T. A. Keith, R. Kobayashi, J. Normand, K. Raghavachari, A. P. Rendell, J. C. Burant, S. S. Iyengar, J. Tomasi, M. Cossi, J. M. Millam, M. Klene, C. Adamo, R. Cammi, J. W. Ochterski, R. L. Martin, K. Morokuma, O. Farkas, J. B. Foresman and D. J. Fox, *Gaussian 16*, Revision B.01, Gaussian Inc. Wallingford CT (USA), 2016.
- 16 C. Riplinger, P. Pinski, U. Becker, E. F. Valeev and F. Neese, *J. Chem. Phys.*, 2016, **144**, 024109.
- 17 F. Neese, *Wiley Interdiscip. Rev. Comput. Mol. Sci.*, 2012, **2**, 73–78.
- 18 W. B. Schneider, G. Bistoni, M. Sparta, M. Saitow, C. Riplinger, A. A. Auer and F. Neese, *J. Chem. Theory Comput.*, 2016, **12**, 4778–4792.
- 19 A. Altun, F. Neese and G. Bistoni, *J. Chem. Theory Comput.*, 2019, **15**, 215–228.
- 20 A. Wuttke and R. A. Mata, *J. Comput. Chem.*, 2017, **38**, 15–23.
- 21 K. Lisac, F. Topić, M. Arhangeliskis, S. Cepić, P. A. Julien, C. W. Nickels, A. J. Morris, T. Friščić and D. Cinčić, *Nat. Commun.*, 2019, **10**, 61.
